# Supplementary material for: Predictive Markers of Treatment Response to Neoadjuvant Systemic Therapy with Dual HER2-Blockade
Source: MDPI journal article supplement (doi:10.3390/cancers16040842), 2024-02-19
Supplement: s1 [file s1]

**Table S1. Baseline characteristics according to tumor-infiltrating lymphocyte levels.**

| Variables                | low TIL levels | high TIL levels | Total      | <i>P</i> value |
|--------------------------|----------------|-----------------|------------|----------------|
| Age                      |                |                 |            | 0.653          |
| < 50                     | 90 (48.9)      | 56 (46.3)       | 146 (47.9) |                |
| ≥ 50                     | 94 (51.1)      | 65 (53.7)       | 159 (52.1) |                |
| HG*                      |                |                 |            | 0.001          |
| 1 or 2                   | 161 (87.5)     | 86 (72.9)       | 247 (81.8) |                |
| 3                        | 23 (12.5)      | 32 (27.1)       | 55 (18.2)  |                |
| HR                       |                |                 |            | 0.011          |
| positive                 | 99 (53.8)      | 47 (38.8)       | 146 (47.9) |                |
| negative                 | 85 (46.2)      | 74 (61.2)       | 159 (52.1) |                |
| ER expression            |                |                 |            | 0.034          |
| ≥ 10%                    | 85 (46.2)      | 39 (32.2)       | 124 (40.7) |                |
| 1-9%                     | 14 (7.6)       | 8 (6.6)         | 22 (7.2)   |                |
| 0                        | 85 (46.2)      | 74 (61.2)       | 159 (52.1) |                |
| PR expression            |                |                 |            | 0.087          |
| ≥ 10%                    | 43 (23.4)      | 18 (14.9)       | 61 (20.0)  |                |
| 1-9%                     | 18 (9.8)       | 8 (6.6)         | 26 (8.5)   |                |
| 0                        | 123 (66.8)     | 95 (78.5)       | 218 (71.5) |                |
| HER2                     |                |                 |            | 0.870          |
| IHC 2+                   | 41 (61.2)      | 143 (60.1)      | 184 (60.3) |                |
| IHC 3+                   | 26 (38.8)      | 95 (39.9)       | 121 (39.7) |                |
| Clinical T stage         |                |                 |            | 0.026          |
| 1                        | 4 (2.2)        | 4 (3.3)         | 8 (2.6)    |                |
| 2                        | 97 (52.7)      | 81 (66.9)       | 178 (58.4) |                |
| ≥ 3                      | 83 (45.1)      | 36 (29.8)       | 119 (39.0) |                |
| Clinical nodal status    |                |                 |            | 0.207          |
| negative                 | 43 (23.4)      | 21 (17.4)       | 64 (21.0)  |                |
| positive                 | 141 (76.6)     | 100 (82.6)      | 241 (79.0) |                |
| Ki-67 (%)*, median (IQR) | 30 (20-60)     | 45 (20-70)      | 30 (20-60) | 0.200          |

\*Missing value

TIL = tumor-infiltrating lymphocyte, HG = histologic grade, HER2 = human-epidermal growth receptor factor 2, HR = hormone receptor, ER = estrogen receptor, PR = progesterone receptor, IHC = immunohistochemistry.
